# Supplementary material for: Low-voltage electro-optical memory device based on NiO nanorods dispersed in a ferroelectric liquid crystal
Source: Royal Society of Chemistry journal article supplement (doi:10.1039/c6ra04037c), 2016-01-01
Supplement: c6ra04037c1.pdf [file c6ra04037c1.pdf]

## Supporting Information

### Low-voltage electro-optical memory device based on NiO nanorods dispersed in a ferroelectric liquid crystal

Achu Chandran<sup>1,2\*</sup>, Jai Prakash<sup>3</sup>, Jitendra Gangwar<sup>2,4</sup>, Tilak Joshi<sup>2</sup>, Avanish Kumar Srivastava<sup>2</sup>, D. Haranath<sup>1,2</sup> and Ashok. M. Biradar<sup>1,2</sup>

<sup>1</sup>*Academy of Scientific and Innovative Research (AcSIR), CSIR-National Physical Laboratory Campus, Dr. K. S. Krishnan Road, New Delhi-110012, India.*

<sup>2</sup>*CSIR-National Physical Laboratory, Dr. K. S. Krishnan Road, New Delhi-110012, India.*

<sup>3</sup>*Department of Physics, Aligarh Muslim University, Aligarh-202002, Uttar Pradesh, India.*

<sup>4</sup>*Department of Physics, The IIS University, Jaipur-302020, India.*

\*E-mail: [ac60369@gmail.com](mailto:ac60369@gmail.com), [chandraa@nplindia.org](mailto:chandraa@nplindia.org)

#### Rietveld refinement of XRD pattern

The observed diffraction peaks were simulated with a Pseudo-voigt profile function. The normal procedure for the Rietveld refinement has been followed for the simulation of experimental X-ray diffraction data. The Rietveld-refined XRD pattern of the NiO nanorods with the observed ( $I_{\text{obs}}$ ; red dots), calculated ( $I_{\text{cal}}$ ; black solid line) and difference ( $I_{\text{obs}}-I_{\text{cal}}$ ; blue solid line) spectra is depicted in Fig. 1(a), resulting in a goodness-of-fit ( $\chi^2$ ) value of 1.95. The structural parameters generated by the Rietveld refinement procedure are listed in Table 1.

**Table 1: Refined structural parameters of NiO as obtained through Rietveld full-profile refinement.**

| Lattice parameters  | a = b = c 4.184724 Å; Space group: $Fm\bar{3}m$ (No. 225) |                  |                   |                 |
|---------------------|-----------------------------------------------------------|------------------|-------------------|-----------------|
| Profile parameters  | Function: Pseudo-voigt                                    |                  |                   |                 |
| FWHM parameters     | U = -9.455620, V = 15.554802, W = 2.303888                |                  |                   |                 |
| Atomic label        | Atomic positions                                          |                  |                   |                 |
|                     | Wyckoff position                                          | $x = y = z$      | $B$               | $Occ.$          |
| O                   | 4b                                                        | 0.50             | 3.03460           | 0.60000         |
| Ni                  | 4a                                                        | 0.00             | 0.49964           | 0.46562         |
| Reliability factors | $R_p$ : 1.73%                                             | $R_{wp}$ : 2.16% | $R_{exp}$ : 1.55% | $\chi^2 = 1.95$ |
